# Supplementary material for: Catalytic selective hydrogenation of acetic acid to acetaldehyde over the surface of the iron shell on Pd–Fe alloy nanoparticles
Source: Royal Society of Chemistry journal article supplement (doi:10.1039/d2cy01021f), 2022-01-01
Supplement: d2cy01021f1.pdf [file d2cy01021f1.pdf]

## Supporting Information

### Catalytic selective hydrogenation of acetic acid to acetaldehyde over the surface of the iron shell on Pd-Fe alloy nanoparticles

Saburo Hosokawa,<sup>1\*</sup> Noriyuki Fukuzumi,<sup>2</sup> Tetsu Nakatani,<sup>2</sup> Tetsuo Honma,<sup>3</sup> Tomoo Mizugaki,<sup>4</sup> Tsunehiro Tanaka,<sup>5</sup> Kenji Wada,<sup>6\*</sup>

<sup>1</sup>*Faculty of Materials Science and Engineering, Kyoto Institute of Technology, Matsugasaki, Sakyo-ku, Kyoto 606-8585, Japan*

<sup>2</sup>*Daicel corporation, Himeji, Hyogo, 671-1283, Japan*

<sup>3</sup>*Japan Synchrotron Radiation Research Institute (JASRI), SPring-8, Sayo, Hyogo 679-5198, Japan*

<sup>4</sup>*Department of Materials Engineering Science, Graduate School of Engineering Science, Osaka University, 1-3 Machikaneyama, Toyonaka, Osaka 560-8531, Japan*

<sup>5</sup>*Department of Molecular Engineering, Graduate School of Engineering, Kyoto University, Kyotodaigaku Katsura, Nishikyo-ku, Kyoto 615-8510, Japan*

<sup>6</sup>*Department of Chemistry for Medicine, Faculty of Medicine, Kagawa University, 1750-1 Ikenobe, Miki-cho, Kita-gun, Kagawa, 761-0793, Japan*

#### \*Corresponding authors

Tel.: +81-75-724-7330

E-mails: [hosokawa@kit.ac.jp](mailto:hosokawa@kit.ac.jp) (S.H.), [wada.kenji@kagawa-u.ac.jp](mailto:wada.kenji@kagawa-u.ac.jp) (K.W.)

Table S1 Results obtained by hydrogenation of acetic acid under various reaction conditions on 28wt% Pd/Fe<sub>2</sub>O<sub>3</sub>.

| React. Pres. (MPa.) | React. Temp. (K) | Contact Time (sec) | H <sub>2</sub> /AC Feed mol ratio | Time on Stream (h) | AD Yield (%) | AC Conv. (%) | AD Sel. (%) | EtOH Sel. (%) | AT Sel. (%) | CO <sub>2</sub> Sel. (%) | CO+HC Sel. (%) |
|---------------------|------------------|--------------------|-----------------------------------|--------------------|--------------|--------------|-------------|---------------|-------------|--------------------------|----------------|
| 0.1                 | 588              | 0.25               | 5                                 | 10                 | 25.8         | 36.3         | 71          | 3.3           | 14.9        | 8.8                      | 1.4            |
| 0.1                 | 588              | 0.25               | 5                                 | 125                | 24.3         | 30           | 80.9        | 6.1           | 7           | 4                        | 1.5            |
| 0.5                 | 588              | 0.25               | 5                                 | 150                | 34.0         | 55           | 61.8        | 21.9          | 5.9         | 3.4                      | 4.1            |
| 0.5                 | 588              | 0.25               | 7                                 | 25                 | 35.5         | 65.6         | 54.1        | 29.7          | 5.5         | 1.9                      | 1.6            |
| 0.5                 | 588              | 0.25               | 7                                 | 200                | 35.6         | 60.4         | 58.9        | 27.4          | 4           | 1.5                      | 2.2            |
| 0.5                 | 588              | 0.125              | 7                                 | 75                 | 35.0         | 51.4         | 68.1        | 23.3          | 2.9         | 1.2                      | 1.6            |
| 0.5                 | 603              | 0.25               | 7                                 | 50                 | 32.8         | 73.4         | 44.7        | 33.7          | 6.8         | 2.6                      | 2.9            |

Table S2 Conversion, yield, and selectivity in hydrogenation of acetic acid (reaction time 24 h).

| Catalyst                               | AC Conv.(%) | AD Yield(%) | Selectivity(%) |      |     |     |     |                 |                 |        |  |
|----------------------------------------|-------------|-------------|----------------|------|-----|-----|-----|-----------------|-----------------|--------|--|
|                                        |             |             | AD             | EtOH | AT  | AE  | ACT | CH <sub>4</sub> | CO <sub>2</sub> | Others |  |
| 2wt%Pd/Fe <sub>2</sub> O <sub>3</sub>  | 50.9        | 30.1        | 59.2           | 22.1 | 9.6 | 0.7 | 2.2 | 1.0             | 3.0             | 2.1    |  |
| 28wt%Pd/Fe <sub>2</sub> O <sub>3</sub> | 65.6        | 35.5        | 54.1           | 29.7 | 5.5 | 1.3 | 5.0 | 0.7             | 1.9             | 1.9    |  |
| 44wt%Pd/Fe <sub>2</sub> O <sub>3</sub> | 72.9        | 33.8        | 46.3           | 32.0 | 7.7 | 2.4 | 5.9 | 0.8             | 2.9             | 2.1    |  |
| 54wt%Pd/Fe <sub>2</sub> O <sub>3</sub> | 58.9        | 38.2        | 64.9           | 24.3 | 5.4 | 1.2 | 0.9 | 0.2             | 2.0             | 1.2    |  |

AC, acetic acid; AD, acetaldehyde; EtOH, ethanol; AT, acetone; AE, ethyl acetate; ACT, diethyl acetal formed from acetaldehyde and ethanol.

Table S3 Conversion, yield, and selectivity in hydrogenation of acetic acid (reaction time 200 h).

| Catalyst                               | AC Conv.(%) | AD Yield(%) | Selectivity(%) |      |     |     |     |                 |                 |        |  |
|----------------------------------------|-------------|-------------|----------------|------|-----|-----|-----|-----------------|-----------------|--------|--|
|                                        |             |             | AD             | EtOH | AT  | AE  | ACT | CH <sub>4</sub> | CO <sub>2</sub> | Others |  |
| 2wt%Pd/Fe <sub>2</sub> O <sub>3</sub>  | 28.0        | 18.9        | 67.5           | 20.9 | 2.5 | 1.9 | 1.3 | 1.8             | 0.8             | 3.4    |  |
| 28wt%Pd/Fe <sub>2</sub> O <sub>3</sub> | 60.4        | 35.5        | 58.8           | 27.4 | 4.0 | 1.1 | 4.5 | 0.9             | 1.5             | 1.8    |  |
| 44wt%Pd/Fe <sub>2</sub> O <sub>3</sub> | 69.4        | 37.7        | 54.4           | 29.0 | 4.4 | 1.3 | 5.4 | 0.8             | 2.8             | 2.0    |  |
| 54wt%Pd/Fe <sub>2</sub> O <sub>3</sub> | 61.9        | 29.8        | 48.1           | 40.3 | 3.1 | 2.0 | 2.9 | 0.5             | 1.1             | 2.0    |  |

AC, acetic acid; AD, acetaldehyde; EtOH, ethanol; AT, acetone; AE, ethyl acetate; ACT, diethyl acetal formed from acetaldehyde and ethanol.

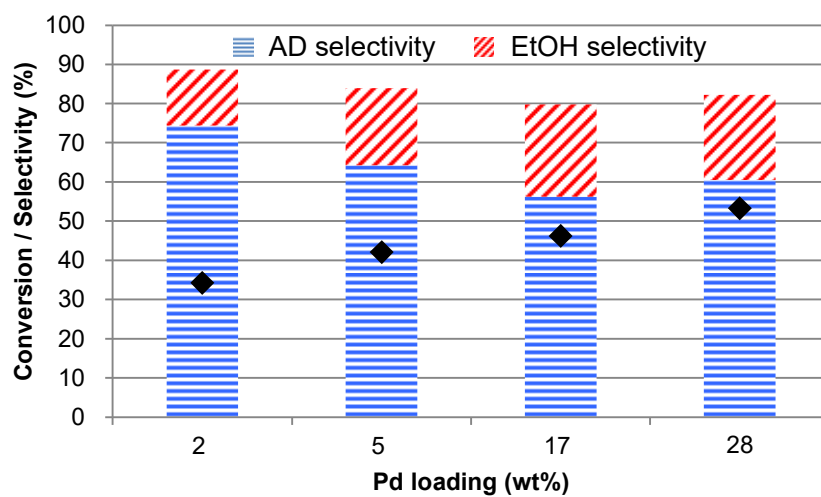

Figure S1 Conversion (◆) and selectivity in hydrogenation of acetic acid after 100 h. Reaction conditions: catalyst weight, 1.0 g; AC flow rate, 0.107 ml min<sup>-1</sup>; H<sub>2</sub> flow rate, 12.57 L h<sup>-1</sup>; contact time, 0.25 sec; reaction temperature, 588 K ; reaction pressure, 0.5 MPa. AC, acetic acid ; AD, acetaldehyde ; EtOH, ethanol.

Table S4 Elemental analysis (C/H/N) results of used catalysts after the reactions for 200 h.

| Catalyst                               | C / Fe <sub>2</sub> O <sub>3</sub> (wt.%) |
|----------------------------------------|-------------------------------------------|
| 2wt%Pd/Fe <sub>2</sub> O <sub>3</sub>  | 9.5                                       |
| 28wt%Pd/Fe <sub>2</sub> O <sub>3</sub> | 4.0                                       |
| 44wt%Pd/Fe <sub>2</sub> O <sub>3</sub> | 1.8                                       |

Table S5 CO pulse adsorption results of the catalysts and BET surface area.

| Catalyst                               | Amount adsorbed<br>(cm <sup>3</sup> g <sup>-1</sup> ) | metal dispersion<br>(%) | BET<br>surface area<br>(m <sup>2</sup> g <sup>-1</sup> ) |
|----------------------------------------|-------------------------------------------------------|-------------------------|----------------------------------------------------------|
| 2wt%Pt/Al <sub>2</sub> O <sub>3</sub>  | 0.766                                                 | 33.32                   | -                                                        |
| 28wt%Pd/Fe <sub>2</sub> O <sub>3</sub> | 0.034                                                 | 0.058                   | 39                                                       |

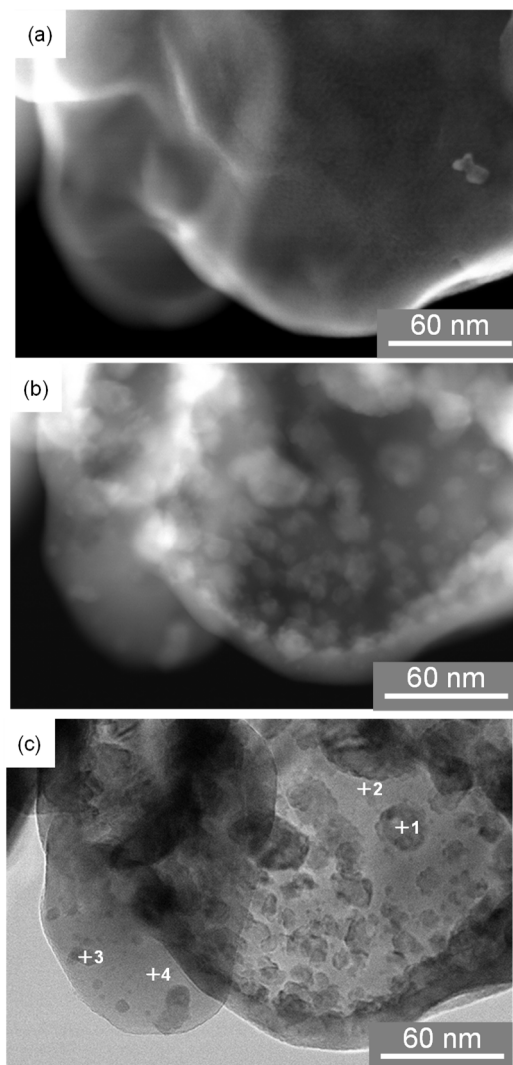

Figure S2 STEM images of as-synthesized 28wt% Pd/Fe<sub>2</sub>O<sub>3</sub>. (a) secondary electron image, (b) reflected electron image, (c) transmission electron image.

Table S6 STEM-EDX analysis results of as-synthesized 28wt%Pd/Fe<sub>2</sub>O<sub>3</sub>.

| Point | O-K<br>(wt%) | Fe-K<br>(wt%) | Pd-K<br>(wt%) |
|-------|--------------|---------------|---------------|
| 1     | 10.4         | 51.7          | 37.9          |
| 2     | 12.2         | 72.2          | 15.5          |
| 3     | 1.7          | 60.6          | 37.7          |
| 4     | 1.5          | 87.1          | 11.4          |

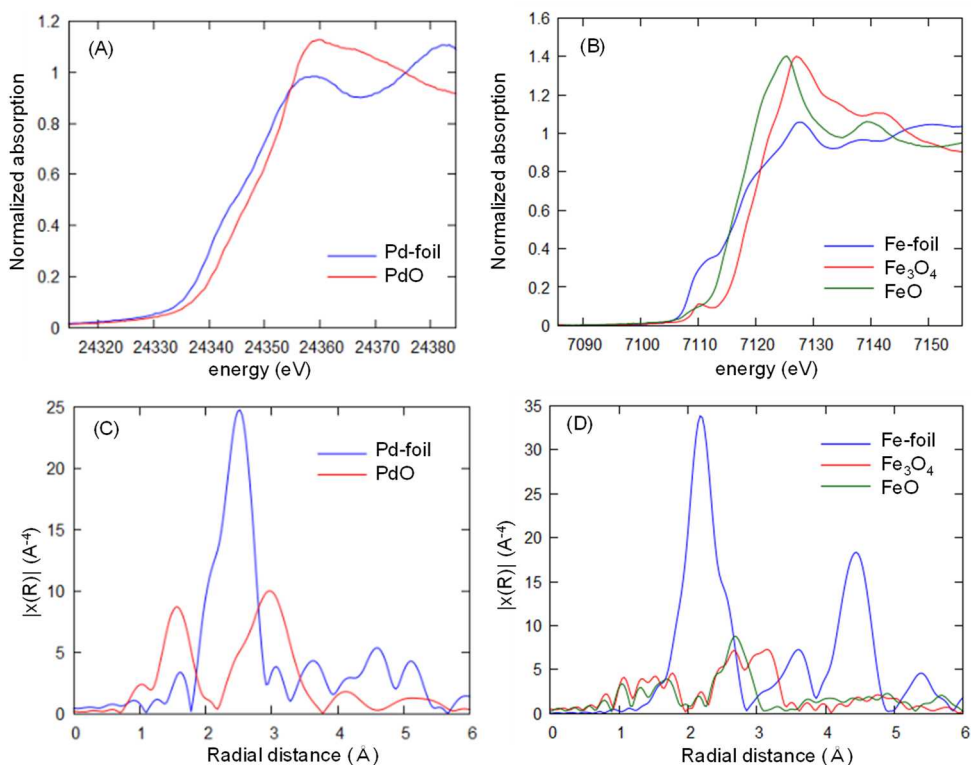

Figure S3 XANES spectra and Fourier transformations of EXAFS spectra for Pd K-edge (A and C) Fe K-edge (B and D) of standard samples. The  $k$  range of Fourier transformation for EXAFS spectrum was 3.0-12.0.

Table S7 Curve fitting analysis of the reduced 28 wt% Pd/Fe<sub>2</sub>O<sub>3</sub> catalyst.

|                                                 | Ab-Sc | CN   | R/Å  | dE/eV | DW/Å <sup>-1</sup> |
|-------------------------------------------------|-------|------|------|-------|--------------------|
| Pd/Fe <sub>2</sub> O <sub>3</sub> <sup>a)</sup> | Pd-Fe | 2.7  | 2.60 | 1.56  | 0.008              |
|                                                 | Pd-Pd | 4.9  | 2.68 | -4.15 | 0.016              |
| Pd metal                                        | Pd-Pd | 12.0 | 2.74 | 0.01  | 0.006              |

a) The catalyst was reduced under H<sub>2</sub> flow at 573 K for 90 min. The curve fitting was performed using the spectra shown in Fig. 5(C-b).

Analysis conditions: Pd/Fe<sub>2</sub>O<sub>3</sub>  $\Delta k = 3.0-12.0$ ,  $\Delta R = 1.3-2.9$ ,  $S_0^2 = 1.0$ ; Pd metal  $\Delta k = 3.0-12.0$ ,  $\Delta R = 1.8-2.9$ ,  $S_0^2 = 0.83$ .

CN: coordination number, R: atomic distance, dE: edge shift, DW: Debye-Waller factor.
